# Supplementary material for: Multiple insights into the two-sided effects of foliar application of cerium oxide nanoparticles on the growth of alfalfa (Medicago sativa L.)
Source: Royal Society of Chemistry journal article supplement (doi:10.1039/d4en00271g), 2024-01-01
Supplement: d4en00271g1.pdf [file d4en00271g1.pdf]

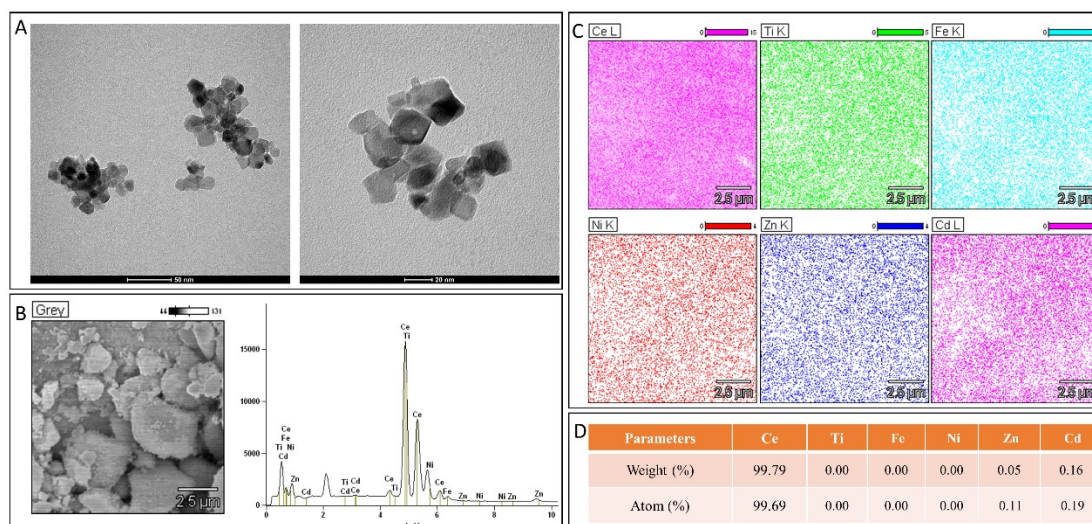

Fig. S1 The characterizations of CeO<sub>2</sub> NPs: (A) SEM images of CeO<sub>2</sub> NPs, (B) EDS spectrum of CeO<sub>2</sub> NPs, (C) EDS elemental mapping images of CeO<sub>2</sub> NPs, and (D) weight and atomic concentration of CeO<sub>2</sub> NPs.

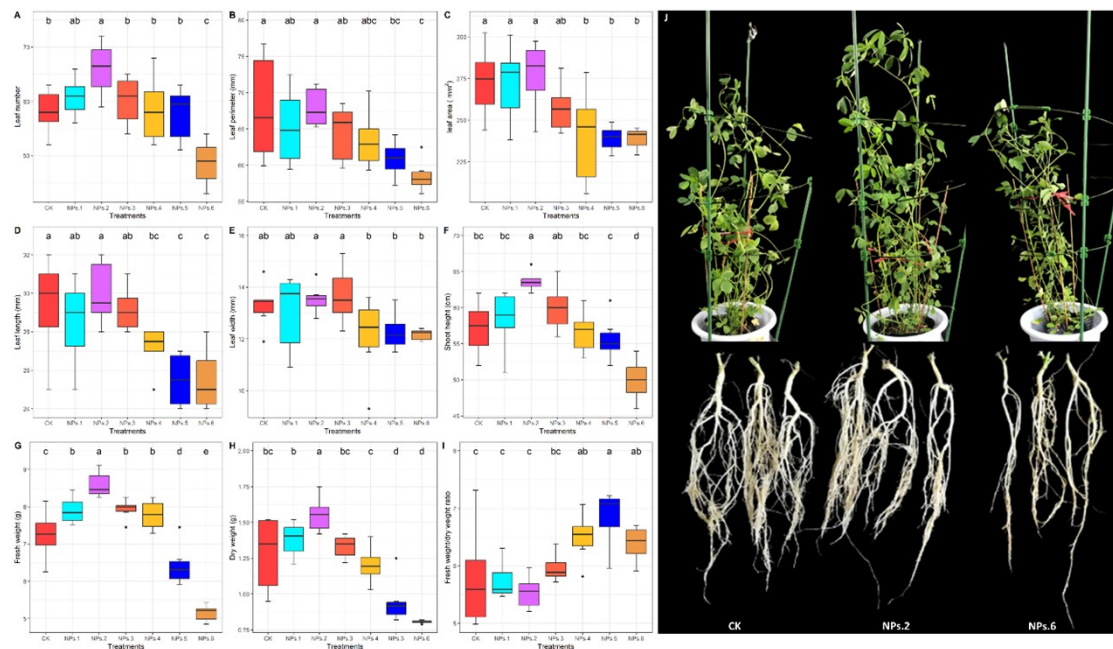

Fig. S2 Effects of CeO<sub>2</sub> NPs on growth traits of alfalfa: (A) leaf number, (B) leaf perimeter, (C) leaf area, (D) leaf length, (E) leaf width, (F) shoot height, (G) fresh weight, (H) dry weight, (I) fresh weight: dry weight ratio, and (J) phenotype of shoots and roots. Data present the means  $\pm$  SD (n=6).

Different letters above the error bars indicate a significant difference at  $P < 0.05$ .

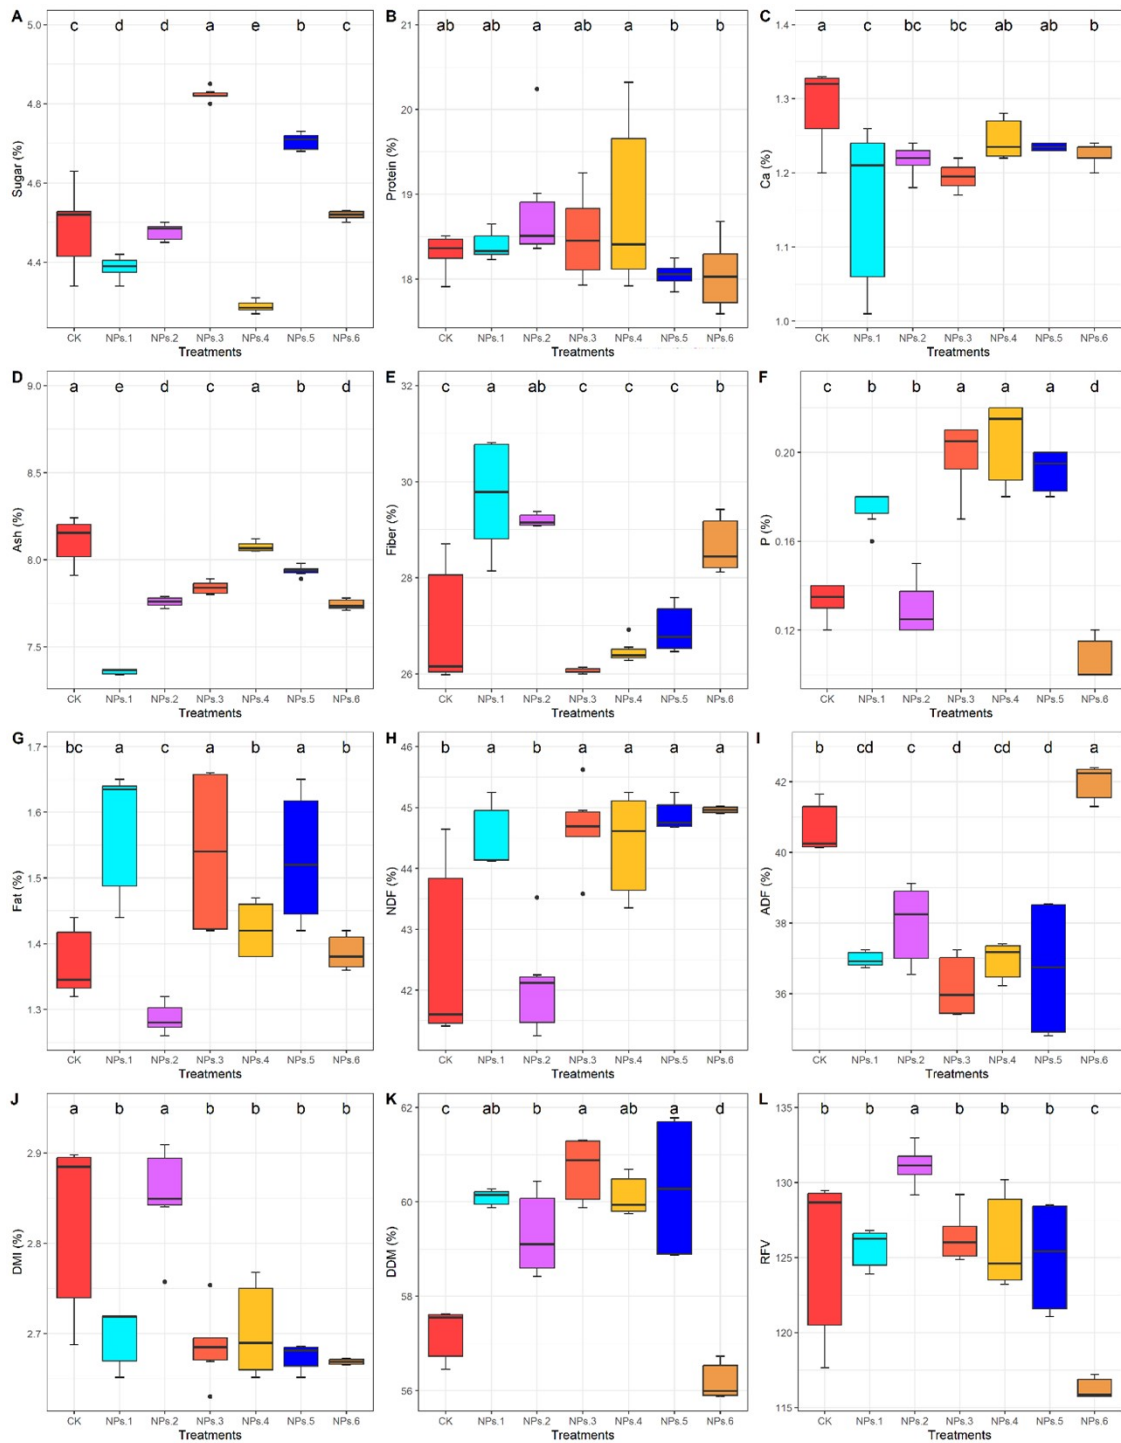

Fig. S3 Effects of  $\text{CeO}_2$  NPs on nutritional traits of alfalfa: (A) sugar, (B) protein, (C) Ca, (D) ash, (E) fiber, (F) P, (G) fat, (H) NDF, (I) ADF, (J) DMI, (K) DDM, and (L) RFV. Data present the means  $\pm$  SD (n=6). Different letters above the error bars indicate a significant difference at  $P < 0.05$ .

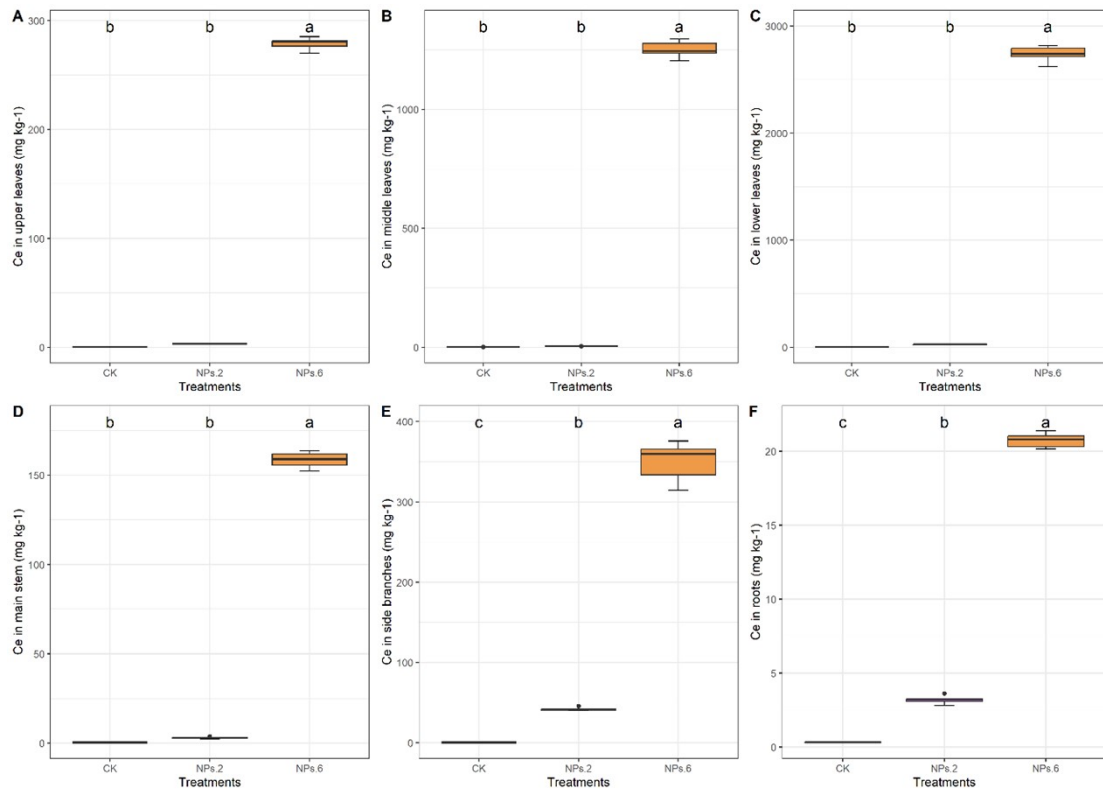

Fig. S4 Effects of CeO<sub>2</sub> NPs on Ce concentration of alfalfa: (A) Ce in upper leaves, (B) Ce in middle leaves, (C) Ce in lower leaves, (D) Ce in main stem, (E) Ce in side branches, and (F) Ce in roots. Data present the means ± SD (n=6). Different letters above the error bars indicate a significant difference at P < 0.05.

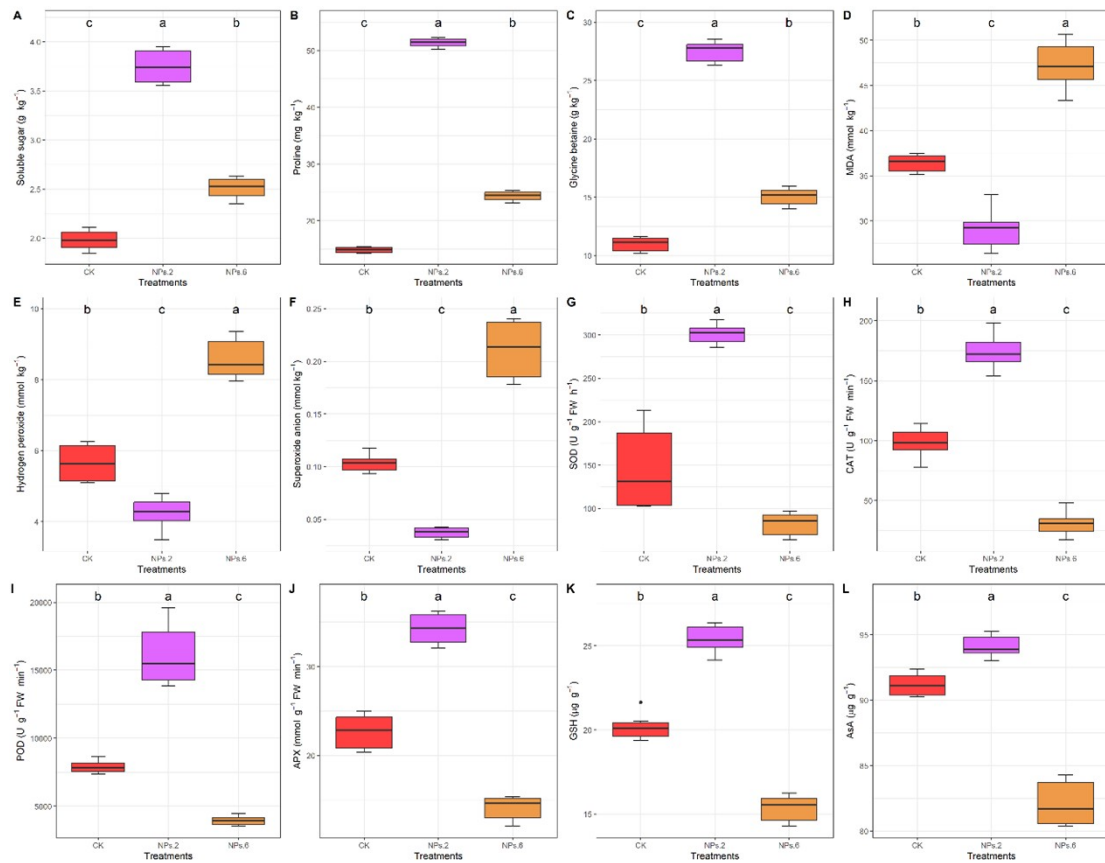

Fig. S5 Effects of  $\text{CeO}_2$  NPs on osmotic and redox homeostasis of alfalfa: (A) soluble sugar, (B) proline, (C) glycine betaine, (D) MDA, (E)  $\text{H}_2\text{O}_2$ , (F)  $\text{O}_2^{\cdot-}$ , (G) SOD, (H) CAT, (I) POD, (J) APX, (K) GSH, and (L) AsA. Data present the means  $\pm$  SD ( $n=6$ ). Different letters above the error bars indicate a significant difference at  $P < 0.05$ .

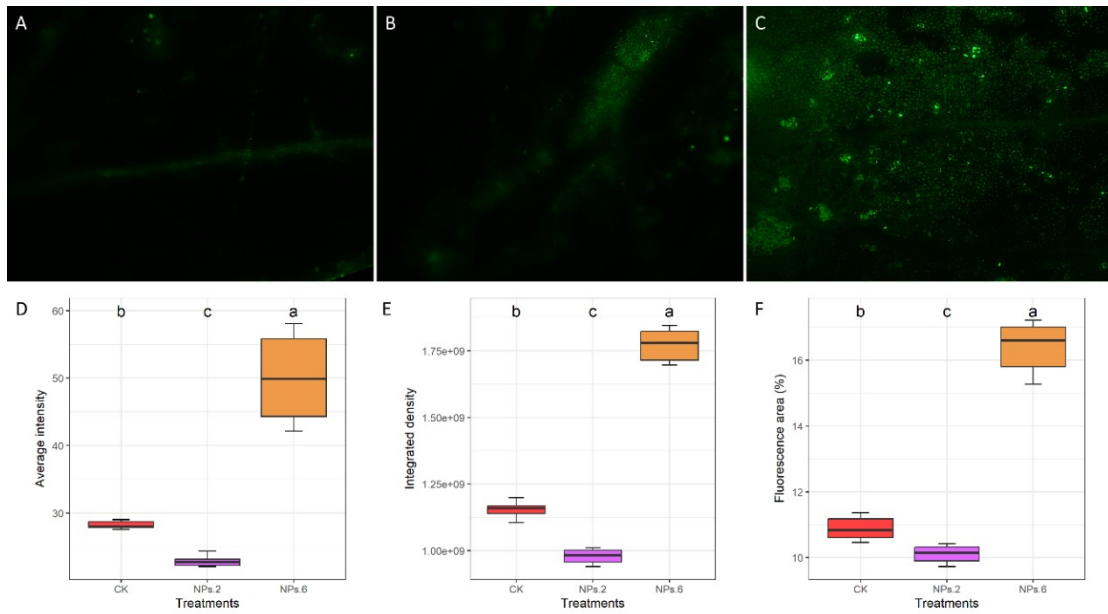

Fig. S6 Effects of CeO<sub>2</sub> NPs on leaf ROS fluorescence intensity of alfalfa: (A)-(C) leaf ROS fluorescence images captured by a 4-fold (200 μm) upright fluorescence microscope for CK, NPs.2, and NPs.6, respectively; (D) -(F) average fluorescence intensity, integrated fluorescence density, and fluorescence area, respectively. Data present the means ± SD (n=6). Different letters above the error bars indicate a significant difference at P < 0.05.

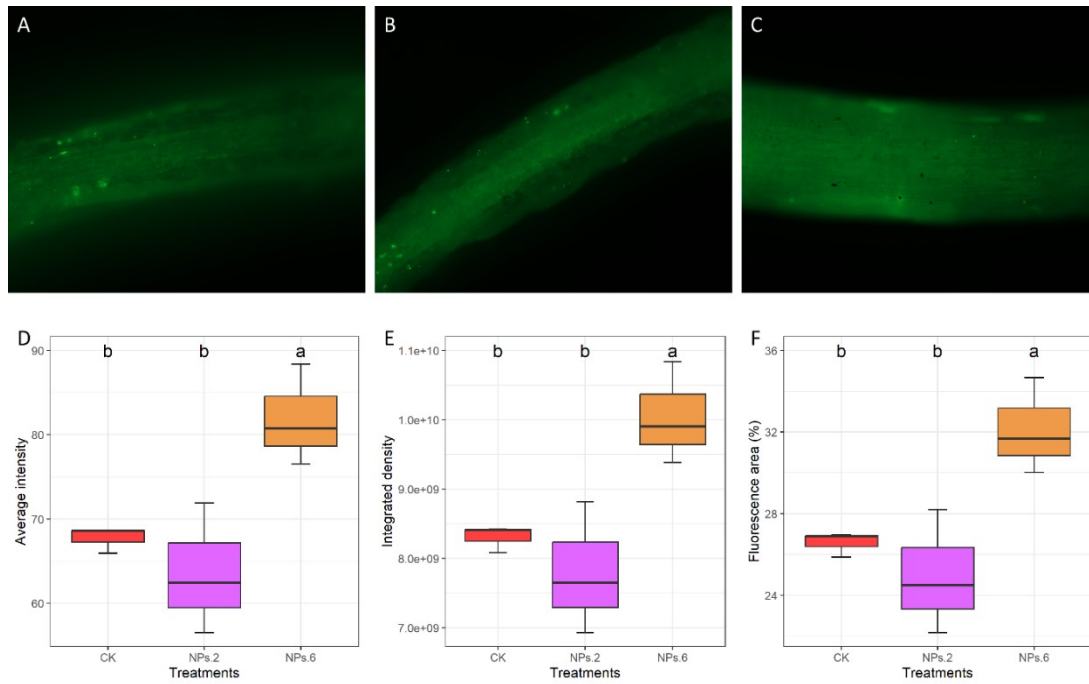

Fig. S7 Effects of CeO<sub>2</sub> NPs on root ROS fluorescence intensity of alfalfa: (A)-(C), fluorescent images of CK, NPs. 2, and NPs.6, respectively; (D)-(F) fluorescence average intensity, fluorescence integrated density, and fluorescence area, respectively. Data present the means  $\pm$  SD (n=6). Different letters above the error bars indicate a significant difference at P < 0.05.

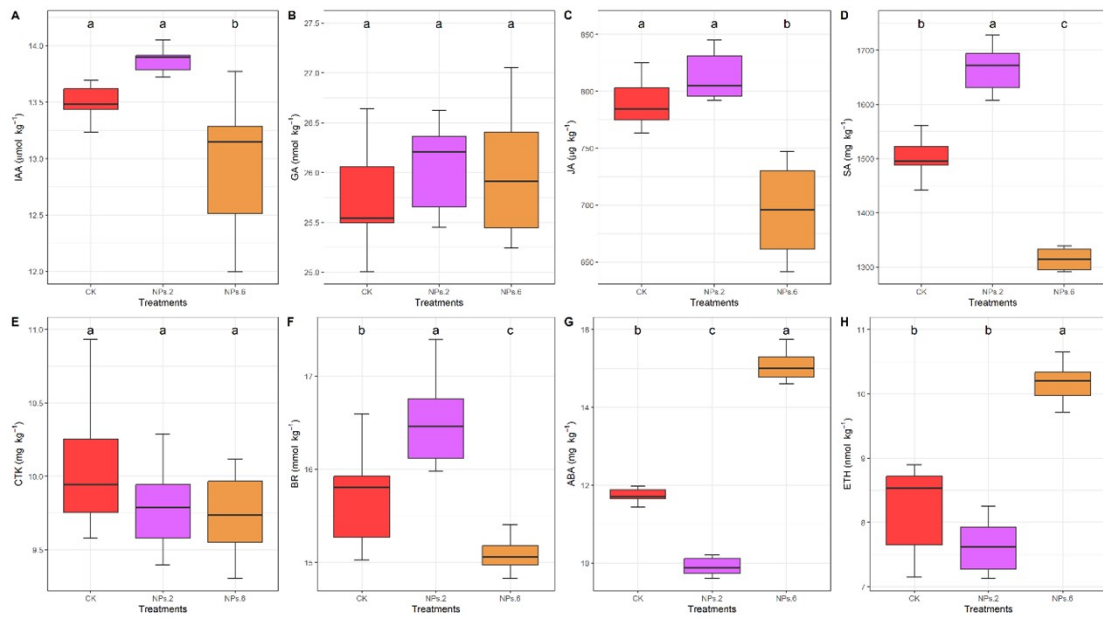

Fig. S8 Effects of  $\text{CeO}_2$  NPs on hormones of alfalfa: (A) IAA, (B) GA, (C) JA, (D) SA, (E) CTK, (F) BR, (G) ABA, and (H) ETH. Data present the means  $\pm$  SD ( $n=6$ ). Different letters above the error bars indicate a significant difference at  $P < 0.05$ .





Table 1 Sequences of the primers used for the genes.

| <b>Gene</b>                 | <b>Forward Primer (5'-3')</b> | <b>Reverse Primer (5'-3')</b> |
|-----------------------------|-------------------------------|-------------------------------|
| <i>Cu/Zn</i><br><i>-SOD</i> | CTCGACAGGACCACATTTCA          | AAGGCTCTCCCAATGACTGA          |
| <i>Fe-</i><br><i>SOD</i>    | GAGTACCATTGGGGAAAGCA          | CCATACCTGTGCTGCATTGT          |
| <i>Mn-</i><br><i>SOD</i>    | GTTGCCAAAGCTGATTCCTC          | ACCACCTCCTTCACGAACAG          |
| <i>CAT</i>                  | CCAAGTCCCACATTCAGGAG          | ACTGCTTCCCAGCCTTGTT           |
| <i>POD</i>                  | CTACCTGGCCCTCATTTCAA          | CTTCTTGGGCTGAATCCGTA          |
| <i>APX</i>                  | GAAATGCGCTCCTCTTATGC          | TGTTAGCACCATGAGCAAGC          |
| <i>SGR</i>                  | CCTGTGGTCTTGAAGGCATTTG        | TGAAAATGTACCCAAACCAAA<br>GC   |
| <i>γVPE</i>                 | TTTCCTCCGATTACCCTCCCAA<br>G   | TCCAGTAGCCATTAGAACCAG<br>CAA  |
| <i>ACD2</i>                 | GCCCTTGTCTCTCCATCAGC          | CCAGCATTACCTTAGCAACAG<br>G    |
| <i>ACD1</i><br><i>1</i>     | GAGACAGATTACGTCGCTAAG<br>G    | CCTCACACGTTTCCCTTGTA          |
| <i>BI-1</i>                 | CTTCTGCCATCTTTGGAGGTTT<br>A   | CCTTCTCAACTATTTCTGCGT<br>GT   |
| <i>UCPI</i>                 | GGTCAAGTCGAGAATGATGGG         | GTTCCAAGATCCTAGCCGTCC         |

-

AGA

A

*UCP2*

*β-*

TTTGAGACTTTCAATGTGCCCG

TAGCATGTGGGAGTGCATAAC

*actin*

CC

CCT

---

Table S2 Eigenvalue and percentage of variance for the first five axes (Dim 1-5) derived from principal component analysis (PCA) and correlation between the axes and the variables.

| <b>Variable</b>         | <b>Dim 1</b> | <b>Dim 2</b> | <b>Dim 3</b> | <b>Dim 4</b> | <b>Dim 5</b> |
|-------------------------|--------------|--------------|--------------|--------------|--------------|
| <b>Eigenvalue</b>       | 61.7105465   | 9.5910921    | 2.9844664    | 2.5465088    | 2.0769855    |
| <b>Variance percent</b> | 70.9316626   | 11.0242437   | 3.4304212    | 2.9270216    | 2.3873397    |
| <b>LN</b>               | 0.86557097   | 0.119454     | 0.069922     | -0.04983     | -0.14239     |
| <b>LA</b>               | 0.7146539    | -0.20878     | 0.043288     | -0.1813      | 0.38021      |
| <b>LP</b>               | 0.68772244   | -0.26815     | 0.277769     | -0.01281     | 0.224702     |
| <b>LL</b>               | 0.71484196   | -0.18012     | 0.013052     | 0.155995     | 0.276192     |
| <b>LW</b>               | 0.72163889   | -0.14016     | 0.093512     | 0.202113     | -0.1108      |
| <b>SH</b>               | 0.90064234   | 0.124558     | 0.055032     | 0.02486      | -0.09324     |
| <b>FW</b>               | 0.96363963   | 0.029532     | 0.043761     | 0.024707     | 0.102073     |
| <b>DW</b>               | 0.90810032   | -0.01088     | 0.227495     | 0.030359     | 0.215141     |
| <b>FW/DW</b>            | -            | 0.067085     | -0.53466     | 0.019168     | -0.39061     |
| <b>sugar</b>            | 0.59115753   | 0.113387     | 0.093245     | -0.18437     | -0.07233     |
| <b>protein</b>          | 0.94922433   | 0.051923     | 0.363733     | -0.01951     | -0.10947     |
| <b>Ca</b>               | 0.58207403   | -0.3346      | 0.087849     | -0.1053      | -0.08855     |
| <b>ash</b>              | 0.84874841   | -0.25081     | 0.288102     | 0.008404     | 0.077796     |
| <b>fiber</b>            | 0.90827891   | 0.237773     | -0.28647     | 0.048621     | -0.16103     |
| <b>P</b>                | 0.83709601   | 0.038023     | -5.3E-05     | -0.4965      | 0.189129     |
| <b>fat</b>              | 0.31042361   | -0.29412     | 0.18678      | -0.40748     | 0.073732     |
| <b>NDF</b>              | 0.68028765   | 0.198009     | -0.4396      | -0.14714     | -0.11712     |
| <b>ADF</b>              | -            | 0.80617481   | -0.01211     | 0.309897     | -0.2496      |
| <b>DMI</b>              | 0.84968708   | -0.31149     | 0.446316     | 0.156164     | 0.115698     |
| <b>DDM</b>              | 0.79943475   | 0.311491     | 0.012112     | -0.3099      | 0.249596     |
| <b>RFV</b>              | 0.84968708   | 0.011696     | 0.298231     | -0.03294     | 0.186854     |
| <b>Pn</b>               | 0.90420501   | 0.030105     | -0.0783      | 0.013928     | 0.083253     |
| <b>Gs</b>               | 0.97828885   | 0.251967     | 0.007642     | 0.064205     | -0.12442     |
| <b>Ci</b>               | 0.91652295   | 0.190094     | -0.01942     | 0.010265     | -0.07871     |
| <b>Tr</b>               | 0.96464623   | 0.222109     | -0.10297     | 0.009448     | -0.04058     |
| <b>CUE</b>              | 0.94718261   | -0.13265     | -0.10925     | 0.027863     | 0.183738     |
| <b>WUE</b>              | 0.92548895   | -0.12429     | 0.140983     | -0.01035     | 0.166958     |
| <b>Chl a</b>            | -            | 0.93039634   | -0.04675     | -0.02949     | -0.02051     |
| <b>Chl b</b>            | 0.94817368   | 0.091768     | 0.022347     | 0.052055     | -0.00261     |
| <b>Chl</b>              | 0.96571019   | -0.112       | -0.01416     | 0.00988      | -0.01236     |
| <b>Car</b>              | 0.99035719   | -0.16989     | -0.12631     | -0.08784     | -0.01369     |
| <b>AFI</b>              | 0.94830512   | 0.159345     | -0.00132     | 0.080358     | 0.142804     |
|                         | -            |              |              |              |              |

|                                   |                 |          |          |          |          |
|-----------------------------------|-----------------|----------|----------|----------|----------|
|                                   | 0.94080975      |          |          |          |          |
| <b>IFD</b>                        | -<br>0.98247137 | 0.141678 | 0.018405 | 0.047073 | 0.055899 |
| <b>FA</b>                         | -<br>0.95656002 | 0.228453 | -0.00393 | 0.068395 | 0.098134 |
| <b>Ce.ul</b>                      | -<br>0.93164841 | 0.356226 | 0.054237 | 0.007999 | 0.026103 |
| <b>Ce.ml</b>                      | -<br>0.93400138 | 0.349849 | 0.057702 | 0.011288 | 0.019321 |
| <b>Ce.ll</b>                      | -<br>0.93215926 | 0.355027 | 0.053075 | 0.00451  | 0.029343 |
| <b>Ce.ms</b>                      | -0.9287479      | 0.362636 | 0.052871 | 0.003137 | 0.029313 |
| <b>Ce.sb</b>                      | -<br>0.88842533 | 0.448039 | 0.074773 | -0.01152 | -0.00389 |
| <b>Ce.r</b>                       | -<br>0.87563003 | 0.476474 | 0.041067 | 0.013019 | 0.042231 |
| <b>MDA</b>                        | -0.9648956      | -0.04994 | -0.01902 | 0.012932 | 0.07947  |
| <b>H<sub>2</sub>O<sub>2</sub></b> | -<br>0.96102994 | 0.015805 | 0.07601  | -0.00949 | 0.147628 |
| <b>O<sub>2</sub><sup>-</sup></b>  | -<br>0.97494275 | -0.02718 | 0.002023 | 0.014525 | 0.003659 |
| <b>SOD</b>                        | 0.87325602      | 0.388565 | -0.16519 | 0.023463 | -0.05856 |
| <b>CAT</b>                        | 0.96064683      | 0.194988 | 0.0133   | -0.11507 | 0.090733 |
| <b>POD</b>                        | 0.90431836      | 0.348924 | 0.050199 | 0.074348 | -0.05112 |
| <b>APX</b>                        | 0.94190372      | 0.251611 | -0.10888 | 0.048455 | -0.05899 |
| <b>GSH</b>                        | 0.96526226      | 0.183869 | -0.01958 | 0.061691 | -0.02229 |
| <b>AsA</b>                        | 0.96782112      | -0.11859 | -0.0514  | 0.08709  | 0.033988 |
| <b>IAA</b>                        | 0.70793008      | 0.025507 | -0.35994 | 0.005565 | 0.288139 |
| <b>GA</b>                         | 0.03790465      | 0.278658 | 0.649776 | -0.21596 | -0.46252 |
| <b>JA</b>                         | 0.86325539      | -0.13773 | 0.139764 | -0.13254 | -0.12998 |
| <b>SA</b>                         | 0.96576144      | 0.136666 | -0.03202 | -0.11705 | -0.01101 |
| <b>CTK</b>                        | 0.10954684      | -0.39149 | -0.55173 | 0.315331 | -0.11312 |
| <b>BR</b>                         | 0.78371989      | 0.193733 | -0.21767 | -0.31159 | 0.093677 |
| <b>ABA</b>                        | -<br>0.98856676 | -0.00127 | 0.067109 | 0.007647 | 0.027915 |
| <b>ETH</b>                        | -0.8882954      | 0.097703 | 0.202943 | -0.06964 | 0.273621 |
| <b>SS</b>                         | 0.54077038      | 0.817968 | -0.10819 | 0.029642 | 0.095543 |
| <b>Pro</b>                        | 0.58461002      | 0.804466 | -0.03505 | 0.034423 | 0.063845 |
| <b>GB</b>                         | 0.59464463      | 0.79526  | -0.07407 | 0.030696 | 0.058618 |
| <b>AR</b>                         | -<br>0.85741995 | 0.255464 | 0.240266 | -0.05591 | -0.14929 |
| <b>Cw</b>                         | 0.95562176      | -0.27485 | -0.0689  | -0.02295 | -0.03465 |
| <b>Pw</b>                         | 0.27393044      | -0.92751 | 0.024988 | -0.02612 | -0.03981 |
| <b>Kw</b>                         | 0.51236073      | -0.78139 | -0.15269 | 0.08452  | -0.04925 |

|                    |            |          |          |          |          |
|--------------------|------------|----------|----------|----------|----------|
| <b>Cew</b>         | -          | 0.508636 | 0.05323  | 0.02263  | 0.040579 |
|                    | 0.85634772 |          |          |          |          |
| <b>Ca%</b>         | 0.83968421 | 0.413825 | -0.09574 | -0.11319 | 0.094984 |
| <b>Pa%</b>         | 0.40686231 | -0.87194 | 0.036178 | 0.052035 | -0.17053 |
| <b>Ka%</b>         | 0.46096879 | -0.86724 | -0.03538 | -0.0042  | -0.03375 |
| <b>Cea%</b>        | -          | 0.458044 | 0.035442 | 0.032382 | 0.071764 |
|                    | 0.87152865 |          |          |          |          |
| <b>MsCu/Zn-SOD</b> | 0.93167915 | 0.274947 | 0.012046 | 0.140202 | -0.02984 |
| <b>MsFe-SOD</b>    | 0.98448695 | 0.133076 | -0.04968 | -0.0007  | 0.019226 |
| <b>MsMn-SOD</b>    | 0.98767474 | 0.007407 | -0.05374 | 0.021254 | 0.013416 |
| <b>MsPOD</b>       | 0.88738901 | 0.434857 | -0.01346 | 0.044172 | -0.02984 |
| <b>MsCAT</b>       | 0.94981661 | 0.302889 | -0.03302 | 0.027817 | 0.019756 |
| <b>MsAPX</b>       | 0.93791868 | 0.29867  | -0.07178 | -0.00405 | 0.031427 |
| <b>MsACD2</b>      | 0.90111118 | 0.419158 | -0.01152 | 0.091307 | -0.0198  |
| <b>MsACD11</b>     | 0.95367026 | 0.256745 | 0.009597 | 0.093406 | -0.06044 |
| <b>MsSGR</b>       | -          | -0.02846 | 0.052826 | 0.014084 | -0.00768 |
|                    | 0.99691269 |          |          |          |          |
| <b>MsyVPE</b>      | -0.9663078 | -0.19149 | 0.083254 | -0.00705 | -0.06595 |
| <b>MsBI-1</b>      | 0.93805137 | 0.115089 | 0.018533 | 0.198228 | -0.10971 |
| <b>MsUCP1-UCP2</b> | 0.98611534 | -0.10439 | -0.01743 | 0.026991 | -0.07261 |
| <b>LPL</b>         | 0.28695307 | 0.344991 | 0.321026 | 0.523938 | -0.40913 |
| <b>LPW</b>         | 0.89912846 | 0.236789 | -0.06737 | 0.150541 | -0.22761 |
| <b>LPA</b>         | 0.93681477 | 0.142799 | -0.21782 | -0.09378 | -0.1214  |
| <b>LSL</b>         | 0.67008438 | 0.099405 | 0.493089 | -0.0361  | -0.23412 |
| <b>LSW</b>         | 0.16611457 | -0.05603 | -0.03825 | 0.766083 | 0.463174 |
| <b>LSS</b>         | 0.5189811  | 0.016042 | 0.260301 | 0.627829 | 0.241363 |

---
